# Supplementary material for: Synthesis of mesoporous hollow silica nanospheres using polymeric micelles as template and their application as a drug-delivery carrier
Source: Royal Society of Chemistry journal article supplement (doi:10.1039/c3dt51267c), 2013-01-01
Supplement: c3dt51267c.pdf [file c3dt51267c.pdf]

## Supporting Information (SI)

### Synthesis of Mesoporous hollow silica nanospheres using polymeric micelles as template and their application as a drug-delivery carrier

Manickam Sasidharan,<sup>†</sup> Haruna Zenibana,<sup>†</sup> Mahasweta Nandi,<sup>‡</sup> Asim Bhaumik<sup>‡</sup> and Kenichi

Nakashima<sup>†,\*</sup>

<sup>[a]</sup>*Department of Chemistry, Faculty of Science and Engineering, Saga University, 1 Honjo-machi, Saga  
840-8502, Japan*

<sup>[b]</sup>*Department of Materials Science, Indian Association for the Cultivation of Science, Jadavpur, Kolkata –  
700 032, India.*

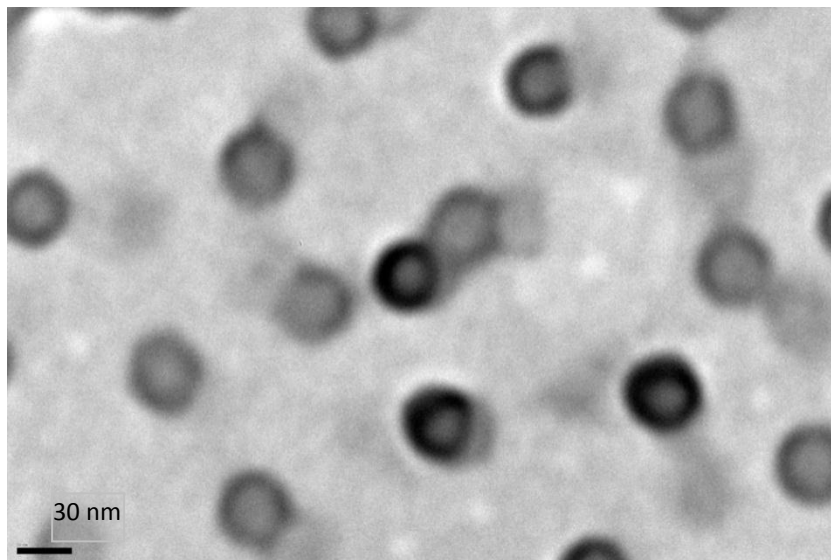

**Figure S1.** TEM pictures of PS–PVP–PEO micelles stained with phosphotungstic acid.

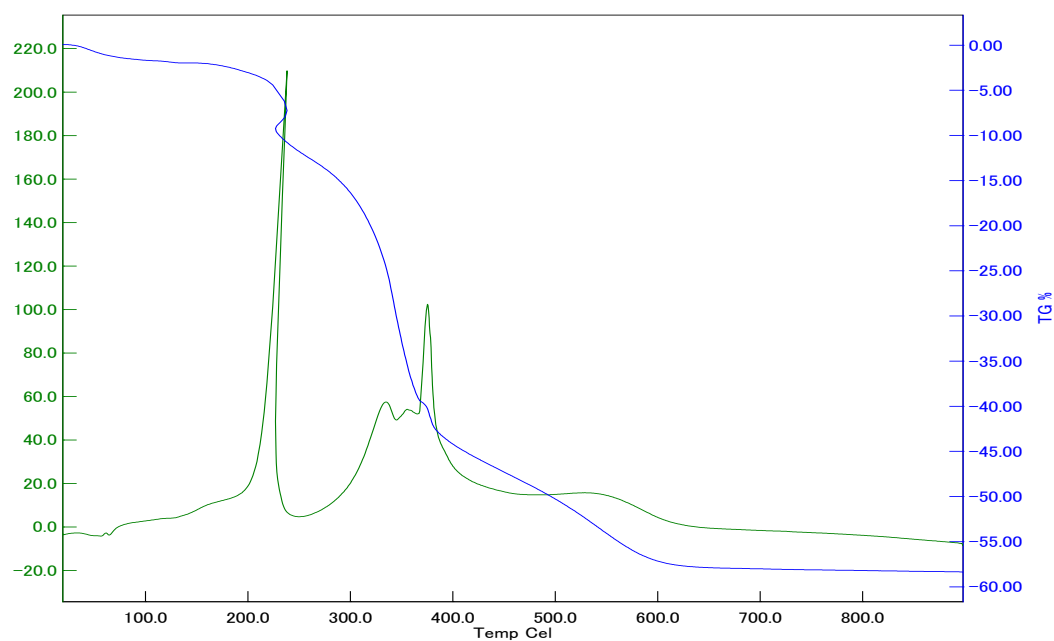

**Figure S2.** TG/DTA analyses of composite particles containing octadecyl functionality before calcinations.

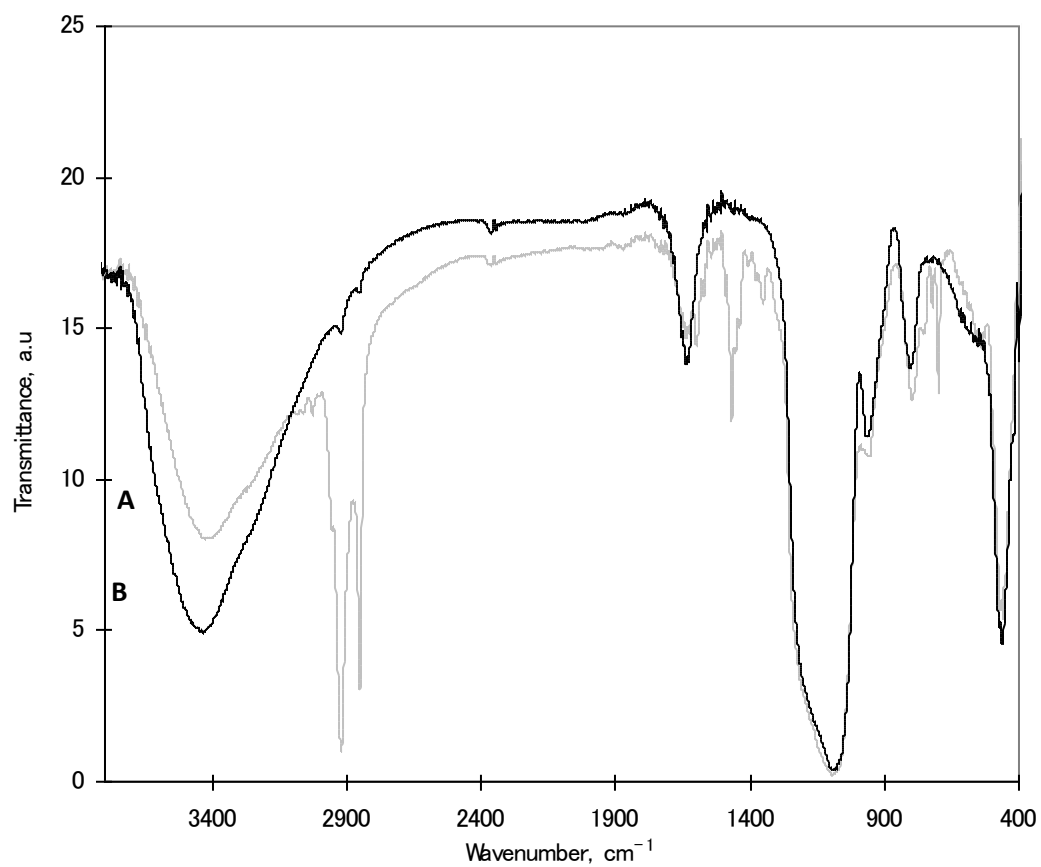

**Figure S3.** FT IR spectra of: (A) composite particles with octadecyl functionality before calcination; (B) after calcinations.

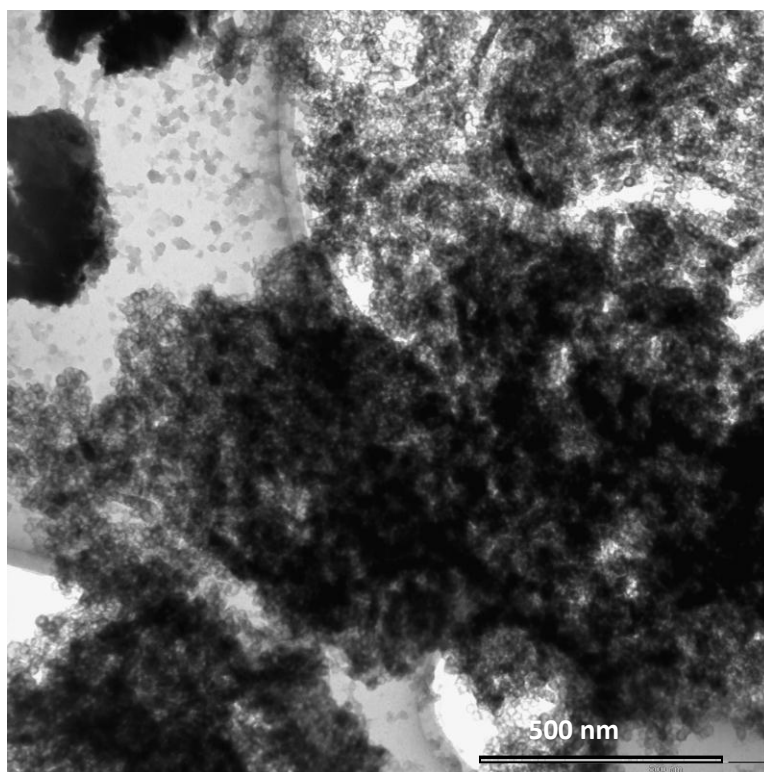

**Figure S4.** TEM image of hollow silica nanospheres obtained with TMOS/octadecylsilane = 4.

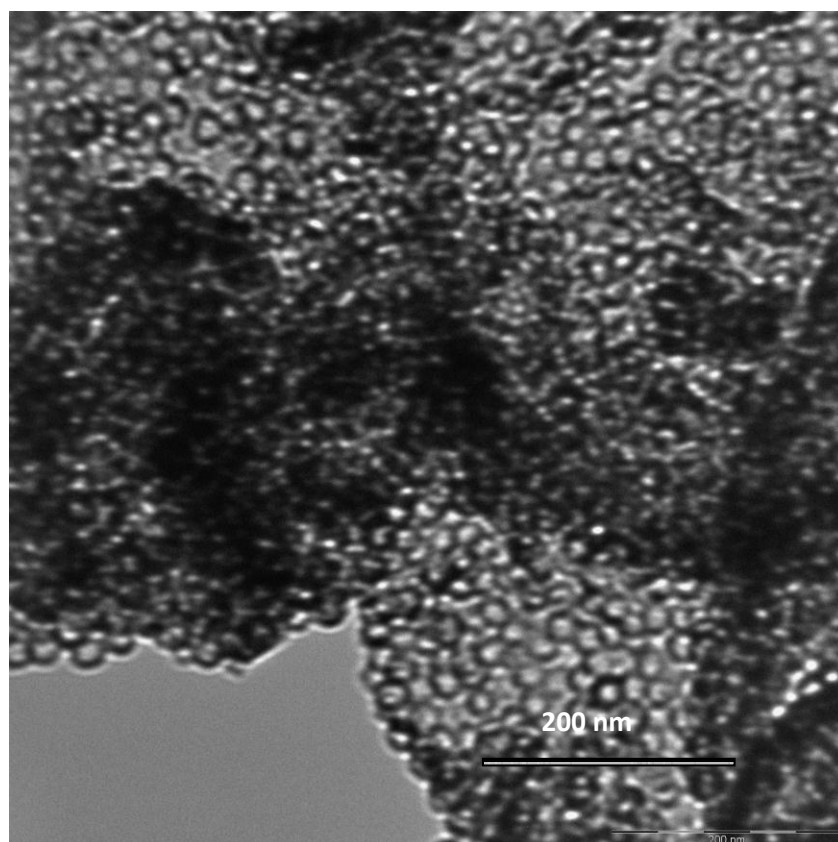

**Figure S5.** TEM image of hollow silica after the drug delivery study.

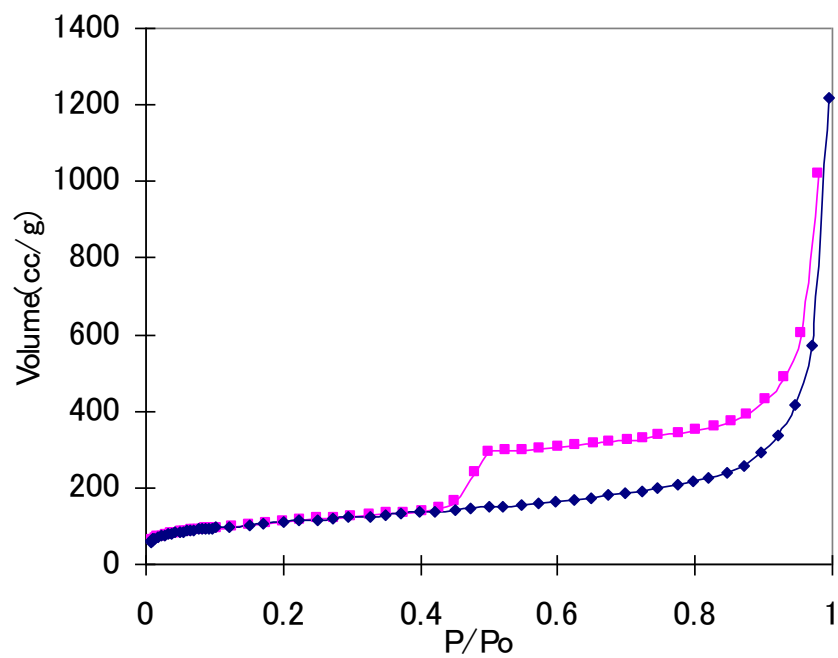

**Figure S6.** Nitrogen adsorption/desorption isotherms of hollow silica nanospheres after the drug delivery.
